# Supplementary material
Source: publisher figshare collection journal article supplement (https://sage.figshare.com/ndownloader/files/33037161)
Supplement: Supplementary file 1 [file 33037161]

## Appendix 1: Questionnaire items

| Variable                            | Item                                                                                                                                                                      | Answer                                                                                                                                                                 | Reference                                                |
|-------------------------------------|---------------------------------------------------------------------------------------------------------------------------------------------------------------------------|------------------------------------------------------------------------------------------------------------------------------------------------------------------------|----------------------------------------------------------|
| <b>Pre-experiment questionnaire</b> |                                                                                                                                                                           |                                                                                                                                                                        |                                                          |
| <i>Demographics</i>                 |                                                                                                                                                                           |                                                                                                                                                                        |                                                          |
| <b>Year of birth</b>                | In what year were you born?                                                                                                                                               | Open-ended                                                                                                                                                             |                                                          |
| <b>Gender</b>                       | What is your gender                                                                                                                                                       | Male; Female; Other                                                                                                                                                    |                                                          |
| <b>Education level</b>              | What is your highest completed education?                                                                                                                                 | No education;<br>Elementary education;<br>High school education;<br>Bachelor degree (MBO, HBO, WO); Master degree (HBO; WO); MBA or Doctoral/PhD.                      |                                                          |
| <b>Ethnicity</b>                    | Do you belong to an ethnic minority in The Netherlands?                                                                                                                   | Yes; No                                                                                                                                                                | European Social Survey, 2016                             |
| <i>Potential covariates</i>         |                                                                                                                                                                           |                                                                                                                                                                        |                                                          |
| <b>Screener</b>                     | On which of the following social media platforms do you have an account?                                                                                                  | Twitter; Facebook; Snapchat; Vine; Musical.ly; LinkedIn; Yammer; Instagram; Flickr; Pinterest; Other, namely___; I do not have an account on any social media platform |                                                          |
| <b>Time spend on social media</b>   | How many <u>minutes</u> do you spend <u>per day</u> on average on social media?                                                                                           | Open-ended                                                                                                                                                             |                                                          |
| <b>Public transport usage</b>       | How many <u>times per week</u> do u use public transport on average? Note: 1 journey equals 1 time. Please count one-way journeys. A round trip, thus, counts as 2 times. | Open-ended                                                                                                                                                             |                                                          |
| <b>Experience fines</b>             | How many <u>times</u> in the past <u>month</u> have you been fined while using public transport?                                                                          | Open-ended                                                                                                                                                             |                                                          |
| <b>Compliance motivation:</b>       | To what extent do you (dis)agree with the following statements:                                                                                                           | Scale 1 – 10 (completely disagree; completely agree)                                                                                                                   | Inspired by Winter & May (2011); Nielsen & Parker (2012) |
| <i>Calculative</i>                  | The chance of getting caught for violating public transport laws is high                                                                                                  |                                                                                                                                                                        |                                                          |
| <i>Normative</i>                    | I comply with public transport laws because it is my duty                                                                                                                 |                                                                                                                                                                        |                                                          |
| <i>Social</i>                       | My friends and family expect me to comply with public transport laws                                                                                                      |                                                                                                                                                                        |                                                          |

|                                      |                                                                                                                                                                                                                                                                                                      |                                                                                                                                                         |                                               |
|--------------------------------------|------------------------------------------------------------------------------------------------------------------------------------------------------------------------------------------------------------------------------------------------------------------------------------------------------|---------------------------------------------------------------------------------------------------------------------------------------------------------|-----------------------------------------------|
| <b>Procedural fairness</b>           | <p>To what extent do you (dis)agree with the following statements:</p> <p>(1) In the execution of their tasks, the public transport respects passengers' rights</p> <p>(2) You can rely on just actions from the public transport</p> <p>(3) The public transport treats every passenger equally</p> |                                                                                                                                                         | Adapted from Grimmelikhuijsen & Meijer (2015) |
| <b>Post-experiment questionnaire</b> |                                                                                                                                                                                                                                                                                                      |                                                                                                                                                         |                                               |
| <b><i>Experiment checks</i></b>      |                                                                                                                                                                                                                                                                                                      |                                                                                                                                                         |                                               |
| <b>Attention check</b>               | Please select <i>red</i> for this question.                                                                                                                                                                                                                                                          | Green; Red; Blue                                                                                                                                        |                                               |
| <b>Treatment check</b>               | To what extent do you (dis)agree with the following statements?                                                                                                                                                                                                                                      | Scale 1 – 10 (completely disagree; completely agree)                                                                                                    | Inspired by de Boer (2018)                    |
| <b><i>Legal dimension</i></b>        | <p>The train conductor/city watch was:</p> <p>(1) Threatening</p> <p>(2) Coercive</p> <p>(3) Rigid</p>                                                                                                                                                                                               |                                                                                                                                                         |                                               |
| <b><i>Facilitation dimension</i></b> | <p>(1) Advising</p> <p>(2) Helpful</p> <p>(3) Facilitating</p>                                                                                                                                                                                                                                       |                                                                                                                                                         |                                               |
| <b><i>Dependent variables</i></b>    |                                                                                                                                                                                                                                                                                                      |                                                                                                                                                         |                                               |
| <b>Obedience</b>                     | You have two options regarding the fine. Which of the two options do you choose?                                                                                                                                                                                                                     | <p>(1) Pay the conductor/city watch the fine immediately</p> <p>(2) Object to the fine and do not pay the conductor/city watch the fine immediately</p> |                                               |
| <b>Public shaming</b>                | (1) What is the tone of your review?                                                                                                                                                                                                                                                                 | Scale 1- 10 (completely negative – completely positive)                                                                                                 |                                               |
|                                      | (2) How do you describe your interaction with the conductor?                                                                                                                                                                                                                                         | Scale 1 – 10 (very unpleasant – very pleasant)                                                                                                          |                                               |

|  |                                        |                                                  |  |
|--|----------------------------------------|--------------------------------------------------|--|
|  | (3) How do you describe the conductor? | Scale 1 – 10 (very incompetent – very competent) |  |
|--|----------------------------------------|--------------------------------------------------|--|

## Appendix II: Factor analysis latent variables

### Treatment check

*Perceived enforcement style* (Scale from 1 – 10)

*Experiment 1:* To what extent do you (dis)agree with the following statements?

The train conductor was:

|   | Item               | Facilitation dimension | Legal dimension |
|---|--------------------|------------------------|-----------------|
| 1 | Advising           | <b>.903</b>            | -.193           |
| 2 | Helpful            | <b>.904</b>            | -.261           |
| 3 | Facilitating       | <b>.890</b>            | -.104           |
| 4 | Threatening        | -.166                  | <b>.877</b>     |
| 5 | Coercive           | -.138                  | <b>.925</b>     |
| 6 | Rigid              | -.229                  | <b>.844</b>     |
|   | $\alpha$           | .907                   | .882            |
|   | Eigenvalue         | 3.46                   | 1.52            |
|   | Variance explained | 57.65                  | 25.27           |

Note: PCA with varimax rotated factor loadings

*Experiment 2:* To what extent do you (dis)agree with the following statements?

The city watch officer was:

|   | Item               | Facilitation dimension | Legal dimension |
|---|--------------------|------------------------|-----------------|
| 1 | Advising           | <b>.790</b>            | .074            |
| 2 | Helpful            | <b>.843</b>            | -.266           |
| 3 | Facilitating       | <b>.873</b>            | -.124           |
| 4 | Threatening        | -.050                  | <b>.856</b>     |
| 5 | Coercive           | -.113                  | <b>.908</b>     |
| 6 | Rigid              | -.106                  | <b>.852</b>     |
|   | $\alpha$           | .797                   | .852            |
|   | Eigenvalue         | 1.73                   | 2.77            |
|   | Variance explained | 28.72                  | 46.24           |

Note: PCA with varimax rotated factor loadings

## Dependent variable

### *Online public shaming of bureaucrats* (Scale from 1 – 10)

*Experiment 1:* After your train journey, you decide to write an online review about your interaction with the conductor:

| Item                                                                                                       | F1                       |
|------------------------------------------------------------------------------------------------------------|--------------------------|
| 1 What is the tone of your review? (R)<br>(Scale: completely negative – completely positive)               | <b>.862</b>              |
| 2 How do you describe your interaction with the conductor? (R)<br>(Scale: very unpleasant – very pleasant) | <b>.893</b>              |
| 3 How do you describe the conductor? (R)<br>(Scale: very incompetent – very competent)                     | <b>.848</b>              |
|                                                                                                            | $\alpha$ .835            |
|                                                                                                            | Eigenvalue 2.26          |
|                                                                                                            | Variance explained 75.28 |

Note: PCA with varimax rotated factor loadings

*Experiment 2:* After your car journey, you decide to write an online review about your interaction with the city watch officer:

| Item                                                                                                       | F1                       |
|------------------------------------------------------------------------------------------------------------|--------------------------|
| 1 What is the tone of your review? (R)<br>(Scale: completely negative – completely positive)               | <b>.891</b>              |
| 2 How do you describe your interaction with the conductor? (R)<br>(Scale: very unpleasant – very pleasant) | <b>.926</b>              |
| 3 How do you describe the conductor? (R)<br>(Scale: very incompetent – very competent)                     | <b>.900</b>              |
|                                                                                                            | $\alpha$ .890            |
|                                                                                                            | Eigenvalue 2.46          |
|                                                                                                            | Variance explained 82.02 |

Note: PCA with varimax rotated factor loadings

## Covariates

### *Procedural fairness* (Scale from 1 – 10)

*Experiment 1:* To what extent do you (dis)agree with the following statements?

| Item                                                                               | F1                       |
|------------------------------------------------------------------------------------|--------------------------|
| 1 In the executing of their task, the public transport respects passengers' rights | <b>.888</b>              |
| 2 You can rely on just actions from the public transport                           | <b>.873</b>              |
| 3 The public transport treats every passenger equally                              | <b>.871</b>              |
|                                                                                    | $\alpha$ .851            |
|                                                                                    | Eigenvalue 2.31          |
|                                                                                    | Variance explained 77.00 |

Note: PCA with varimax rotated factor loadings

*Experiment 2:* To what extent do you (dis)agree with the following statements?

| Item                                                                         | F1                       |
|------------------------------------------------------------------------------|--------------------------|
| 1 In the executing of their task, the city watch respects passengers' rights | <b>.912</b>              |
| 2 You can rely on just actions from the city watch                           | <b>.936</b>              |
| 3 The city watch treats every passenger equally                              | <b>.919</b>              |
|                                                                              | $\alpha$ .910            |
|                                                                              | Eigenvalue 2.55          |
|                                                                              | Variance explained 85.10 |

Note: PCA with varimax rotated factor loadings
